# Supplementary material
Source: MDPI journal article supplement (https://www.mdpi.com/2079-9292/11/13/1928)
Supplement: s1 [file s1]

## **Supplementary Materials**

**Figure S1.** Characterization of the double-network hydrogel properties.

**Figure S2.** Scanning electron microscopy (SEM) images of the double-network hydrogel.

**Figure S3.** Adhesive properties of PAM-PVA<sub>10</sub> hydrogel.

**Figure S4.** The output performance of the SH-TENG.

**Figure S5.** The screenshots and photos of the self-powered raindrops visual sensing system.

**Figure S6.** The screenshots of the raindrop monitoring.

**Video S1.** SH-TENG drives 50 LEDs.

**Video S2.** Hydrogel as electrode to achieve stretchable luminescence.

**Video S3.** The system monitors the raindrop and luminous display.

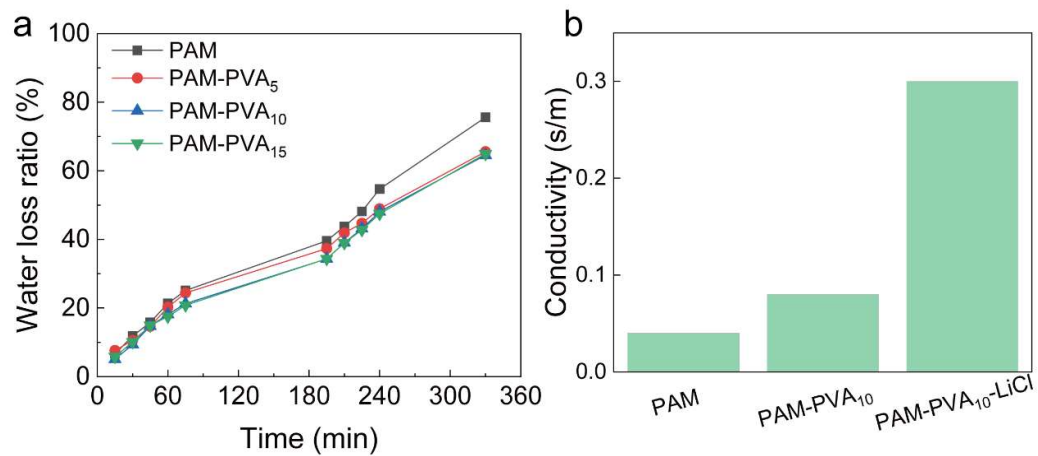

**Figure S1.** Characterization of double-network hydrogel properties. (a) Water loss ratio of hydrogel. (b) Conductivity of hydrogels with various components.

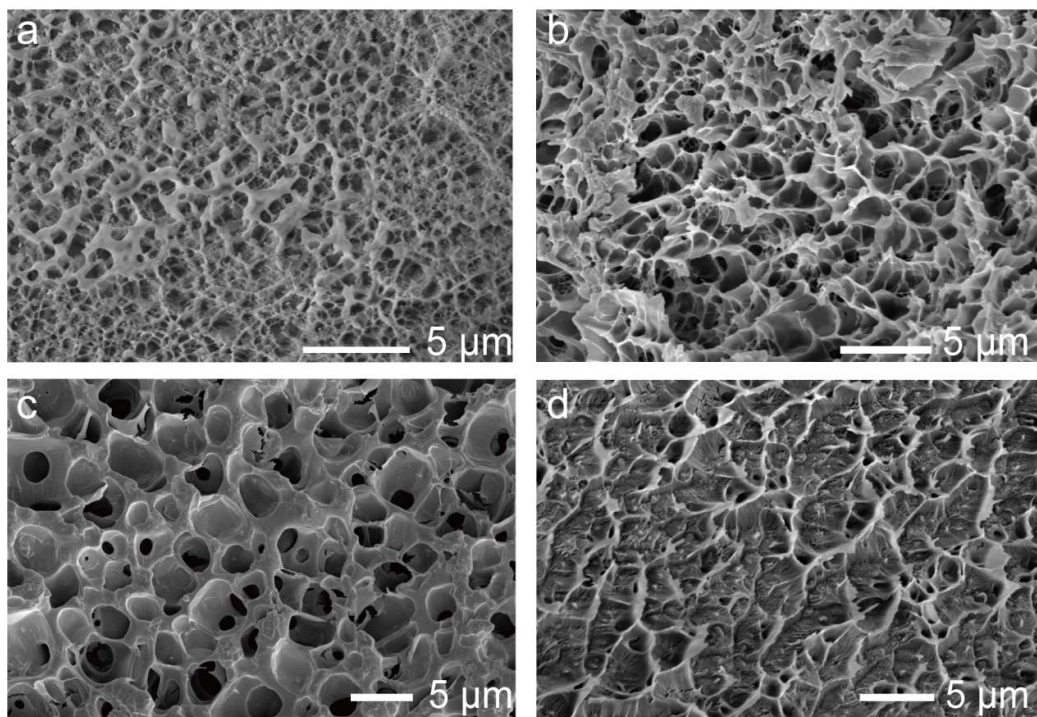

**Figure S2.** Scanning electron microscopy (SEM) images of the double-network hydrogel. SEM of (a) PAM, (b) PAM-PVA<sub>5</sub>, (c) PAM-PVA<sub>10</sub> and (d) PAM-PVA<sub>15</sub> hydrogel, respectively.

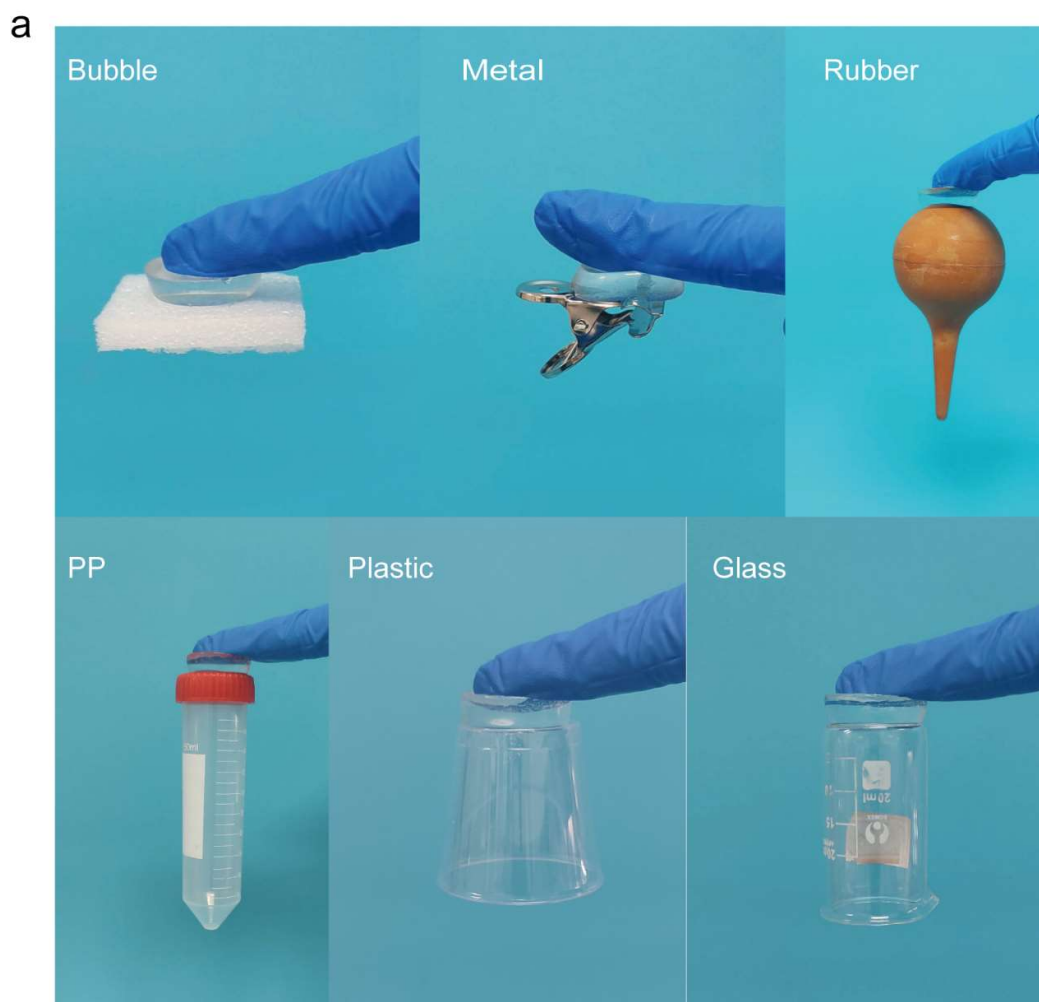

**Figure S3.** Adhesive properties of PAM-PVA<sub>10</sub> hydrogel. (a) The PAM-PVA<sub>10</sub> hydrogel adheres to a variety of materials, including bubble, metal, rubber, PP, plastic, and glass.

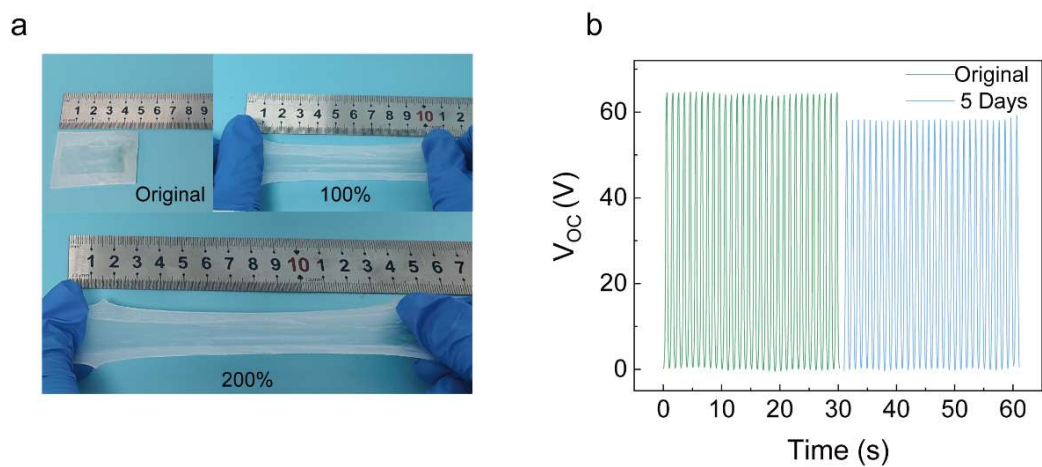

**Figure S4.** The performance of the SH-TENG. (a) Tensile properties of SH-TENG. (b)

Electrical properties of PAM-PVA<sub>10</sub> hydrogel after 5 days at room temperature.

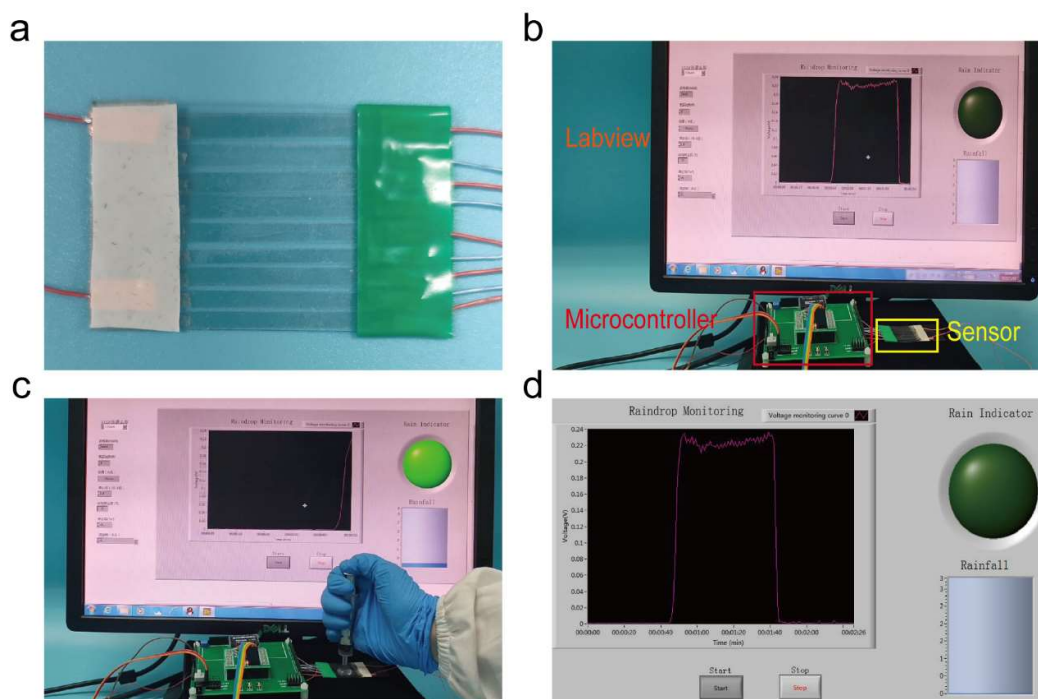

**Figure S5.** The screenshots and photos of the self-powered raindrops visual sensing system. (a) Photograph of the self-powered raindrops visual sensor. (b) Photograph of the experimental setup of the self-powered raindrops visual sensing system. (c) Optical image of raindrop falling on the sensor. (d) Screenshot of the self-powered raindrops visual sensing system during the test.

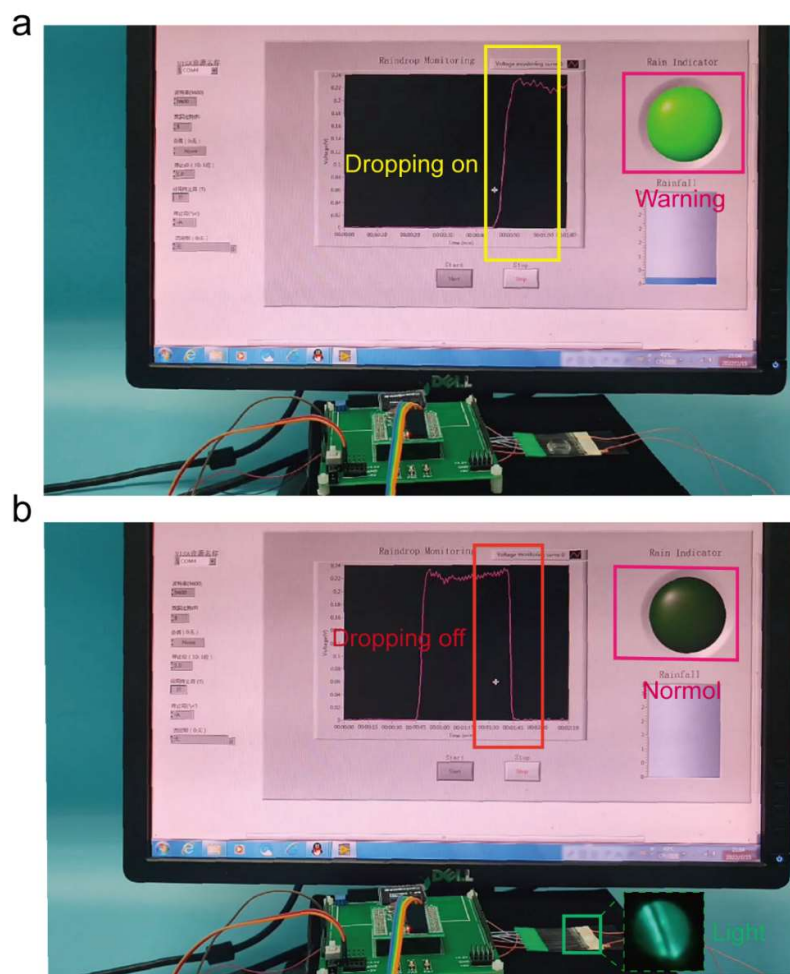

**Figure S6.** The screenshots of the raindrop monitoring. (a) Warning in case of raindrops.

(b) Monitoring without raindrops and luminous display.
