# Supplementary material
Source: MDPI journal article supplement (https://www.mdpi.com/2079-9292/11/13/1928)
Supplement: s1 [file s1]

Archive with 4 entries (4 files):
- electronics-1776410-supplementary.pdf
- Video S1 The SH-TENG driving 50 LEDs.mp4
- Video S2 Hydrogel as electrode to achieve stretchable luminescence.mp4
- Video S3 The system monitors the raindrop and luminous display.mp4
